# Supplementary material for: Soluble adenylyl cyclase: A novel player in cardiac hypertrophy induced by isoprenaline or pressure overload
Source: PLOS journal article supplement (doi:10.1371/journal.pone.0192322), 2018-02-21

## S6 Fig

### Wall thickness of male WT- (Sham/TAC) and sAC-KO (sham/TAC) mice

In (A) an image of a 5  $\mu$ m slice, stained with Masson's trichrome, is shown. The arrows and numbers designate the region of measurement. (B). Means  $\pm$  SEM of wall thickness (1+2) in mm are given for WT+sham (n=4), WT+TAC (n=6) and sAC-KO +sham/TAC (n=5 each). Data were analyzed using two way ANOVA. Differences in values between the groups were not significant.

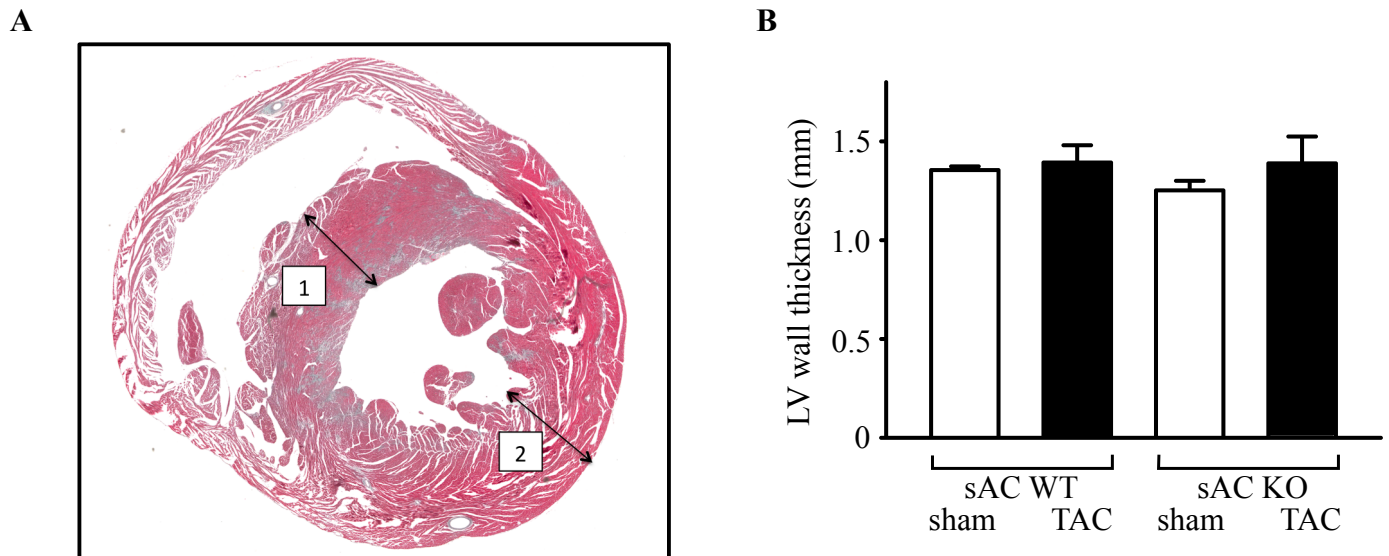

Supplement: S6 (10.1371/journal.pone.0192322.s006) [file journal.pone.0192322.s006]
